# Supplementary material for: Enhanced delivery of melatonin loaded nanostructured lipid carriers duringin vitrofertilization: NLC formulation, optimization and IVF efficacy
Source: Royal Society of Chemistry journal article supplement (doi:10.1039/c9ra10867j), 2020-01-01
Supplement: c9ra10867j1.pdf [file c9ra10867j1.pdf]

**Table S1. ANOVA results for evaluated parameters in the IVF environment**

| Parameters<br>Factors               | Oocytes maturation |                | Two-pre-nucleus embryos development |                | Two-cell stage embryos development |                | Blastocyst production |                |
|-------------------------------------|--------------------|----------------|-------------------------------------|----------------|------------------------------------|----------------|-----------------------|----------------|
|                                     | Between Groups     | Within Groups  | Between Groups                      | Within Groups  | Between Groups                     | Within Groups  | Between Groups        | Within Groups  |
| Sum of Squares                      | 3057.57            | 669.01         | 5076.11                             | 715.56         | 1066.95                            | 661.95         | 2835.54               | 595.56         |
| df                                  | 6                  | 49             | 6                                   | 49             | 6                                  | 49             | 6                     | 49             |
| Mean Square                         | 509.60             | 13.65          | 846.02                              | 14.60          | 177.82                             | 13.51          | 472.59                | 12.15          |
| F                                   | 37.32              | -              | 57.93                               | -              | 13.16                              | -              | 38.88                 | -              |
| Sig.                                | 0.000              | -              | 0.000                               | -              | 0.000                              | -              | 0.000                 | -              |
| groups                              | Mean               | Std. Deviation | Mean                                | Std. Deviation | Mean                               | Std. Deviation | Mean                  | Std. Deviation |
| (1) nanostructured drug 100 $\mu$ M | 94.21 $\pm$ 1.31   | 3.72           | 64.43 $\pm$ 1.18                    | 3.35           | 91.39 $\pm$ 1.23                   | 3.46           | 89.61 $\pm$ 1.32      | 3.75           |
| (2) nanostructured drug 10 $\mu$ M  | 91.14 $\pm$ 1.31   | 3.70           | 60.29 $\pm$ 1.47                    | 4.16           | 88.41 $\pm$ 1.13                   | 3.21           | 84.22 $\pm$ 1.16      | 3.28           |
| (3) nanostructured drug 1 $\mu$ M   | 89.30 $\pm$ 1.18   | 3.33           | 51.38 $\pm$ 1.26                    | 3.55           | 83.62 $\pm$ 1.25                   | 3.55           | 79.45 $\pm$ 1.17      | 3.31           |
| (4) nanostructured drug 100 nM      | 85.09 $\pm$ 1.31   | 3.20           | 45.51 $\pm$ 1.35                    | 3.82           | 81.23 $\pm$ 1.12                   | 3.16           | 74.13 $\pm$ 1.23      | 3.47           |
| (5) nanostructured drug 10 nM       | 78.52 $\pm$ 1.50   | 4.26           | 37.60 $\pm$ 1.26                    | 3.57           | 79.13 $\pm$ 1.17                   | 3.30           | 71.08 $\pm$ 1.14      | 3.24           |
| (6) Free drug 100 $\mu$ M           | 82.18 $\pm$ 1.17   | 3.32           | 51.19 $\pm$ 1.44                    | 4.06           | 84.03 $\pm$ 1.76                   | 4.98           | 77.82 $\pm$ 1.40      | 3.96           |
| (7) Control group                   | 71.11 $\pm$ 1.48   | 4.20           | 38.02 $\pm$ 1.47                    | 4.15           | 78.70 $\pm$ 1.32                   | 3.74           | 67.19 $\pm$ 1.18      | 3.34           |

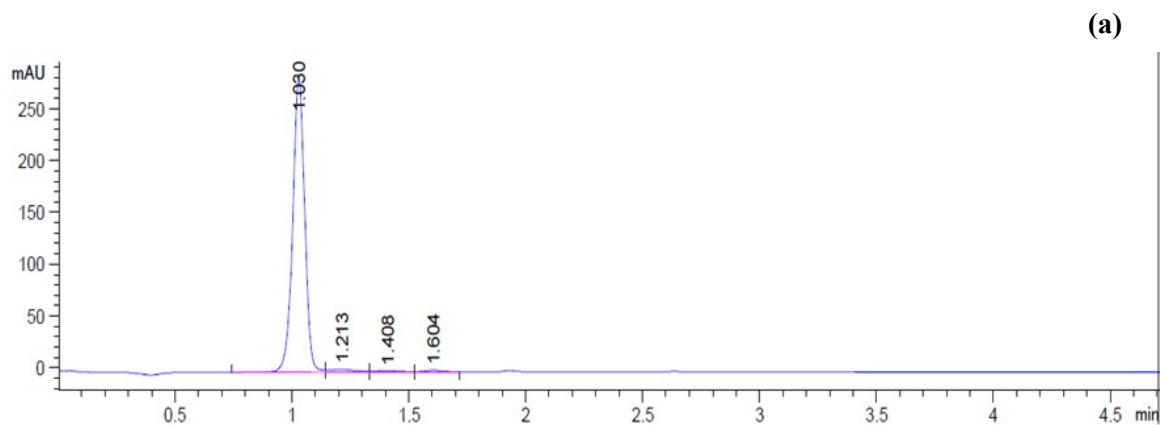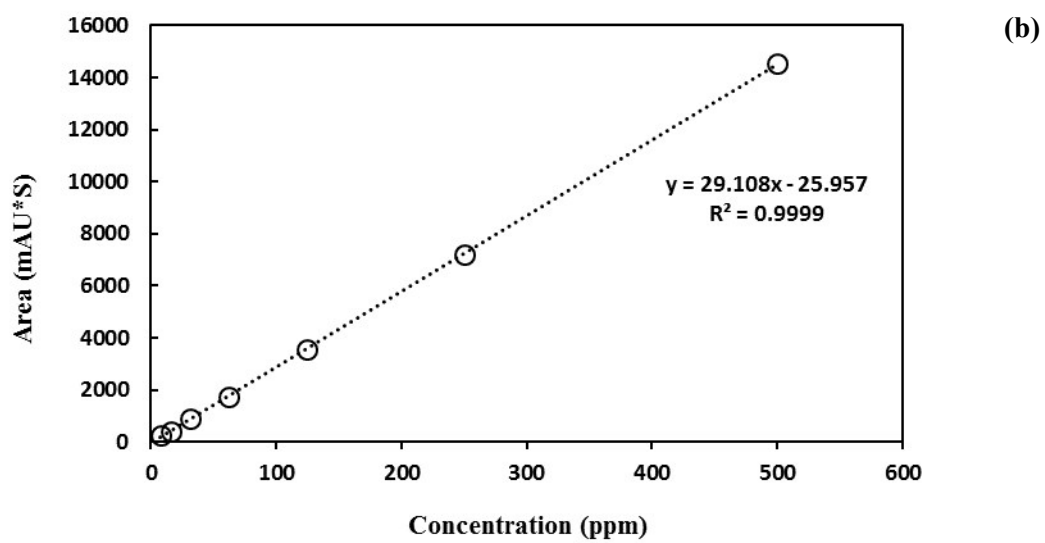

Figure S1. (a) The HPLC curve of melatonin hormone at the concentration of 7.81 ppm and (b) the standard calibration curve for melatonin
